# Supplementary material
Source: PubMed Central journal article supplement (PMC6955465)
Supplement: POEHLMANN_Supplementary_Figures_S1_and_S2.pdf [file POEHLMANN_Supplementary_Figures_S1_and_S2.pdf]

**Figure S1 Budget impact results from sensitivity analyses in patients with type 1 diabetes**

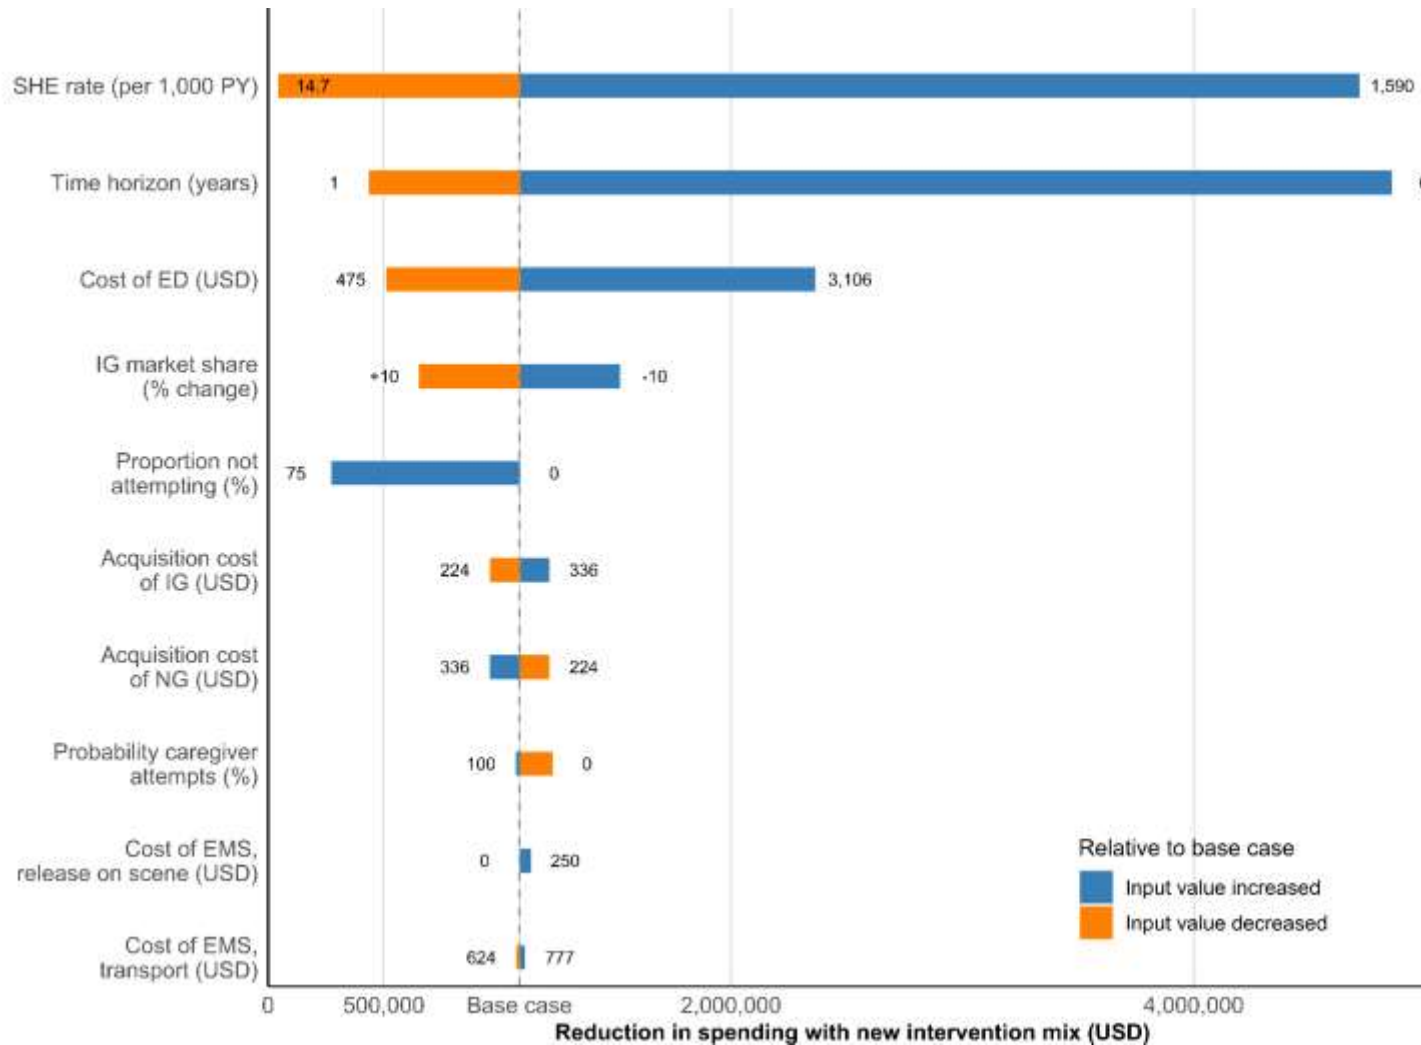

ED, Emergency Department; EMS, Emergency Medical Services; IG, Injectible Glucagon; NG, Nasal Glucagon; PY, Person-Year. Horizontal bars indicate the range of reductions in SHE treatment-related spending between minimum and maximum input values (indicated on either end of the bar).

**Figure S2 Budget impact results from sensitivity analyses in patients with type 2 diabetes treated with basal-bolus insulin**

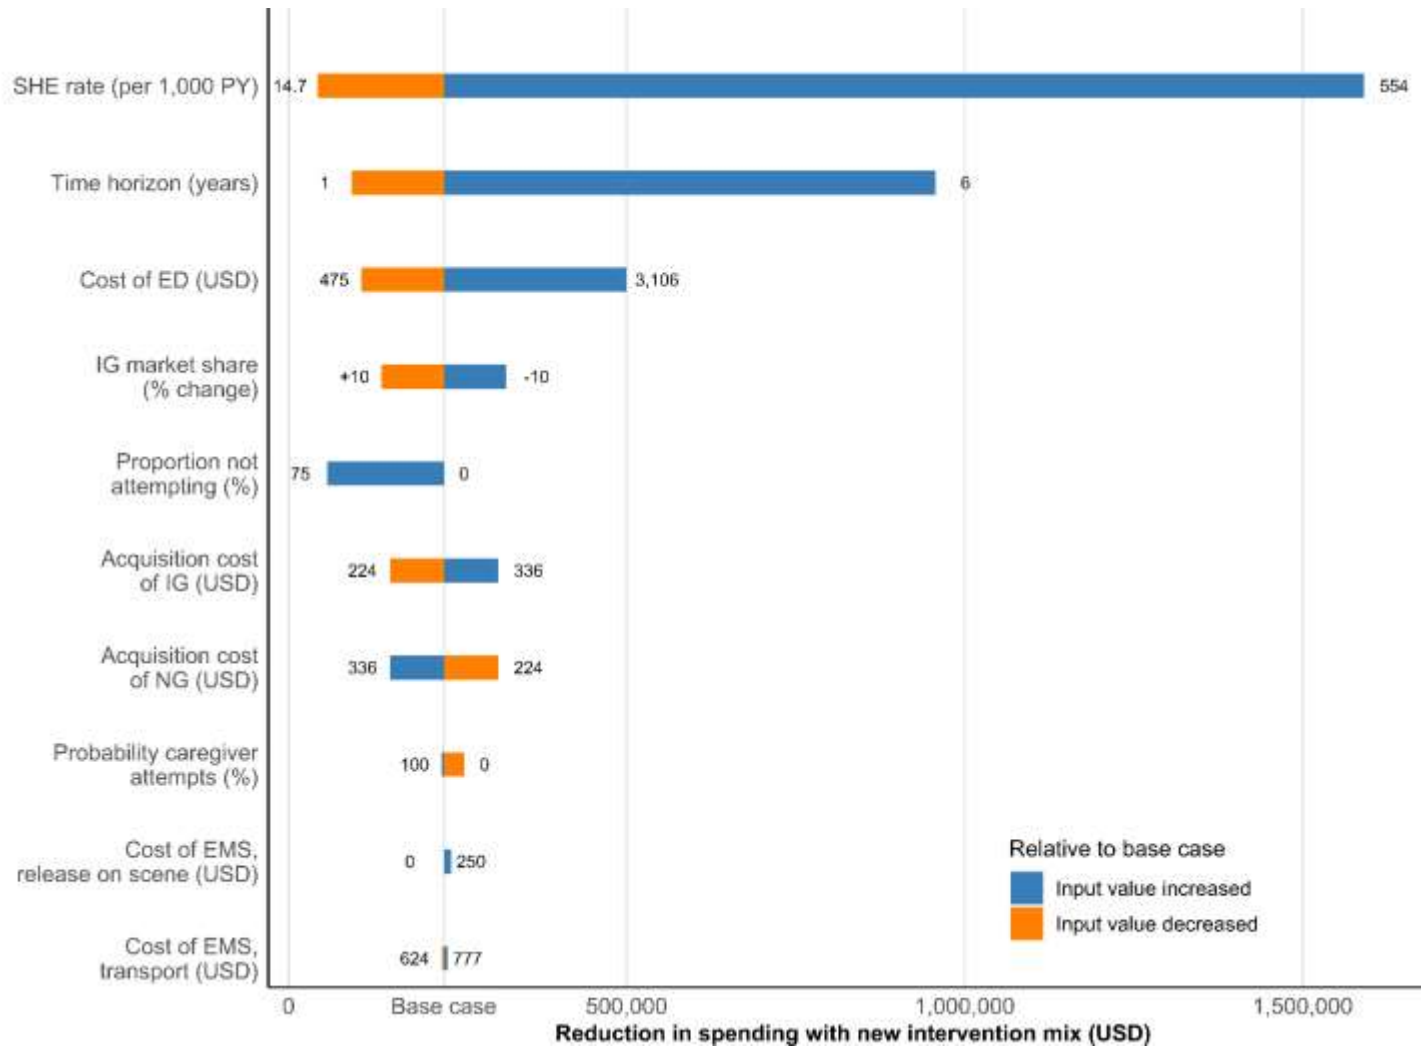

ED, Emergency Department; EMS, Emergency Medical Services; IG, Injectible Glucagon; NG, Nasal Glucagon; PY, Person-Year. Horizontal bars indicate the range of reductions in SHE treatment-related spending between minimum and maximum input values (indicated on either end of the bar).
