# Supplementary material
Source: PubMed Central journal article supplement (PMC6955465)
Supplement: POEHLMANN_Table_S1.pdf [file POEHLMANN_Table_S1.pdf]

**Table S1 Results from two-way sensitivity analyses**

| Scenario <sup>a</sup>                                                                                                                                                                                             | Cost-offset:<br>mean costs per severe<br>hypoglycemic event, USD |       |            | Budget impact:<br>population with type 1 diabetes, USD |                            |            | Budget impact:<br>population with type 2 diabetes treated with basal-<br>bolus insulin, USD |                            |            |
|-------------------------------------------------------------------------------------------------------------------------------------------------------------------------------------------------------------------|------------------------------------------------------------------|-------|------------|--------------------------------------------------------|----------------------------|------------|---------------------------------------------------------------------------------------------|----------------------------|------------|
|                                                                                                                                                                                                                   | IG                                                               | NG    | Difference | Current<br>intervention<br>mix                         | New<br>intervention<br>mix | Difference | Current<br>intervention<br>mix                                                              | New<br>intervention<br>mix | Difference |
| <i>Probability of treatment success (95% confidence interval bounds for proportions administering full or partial glucagon doses)<sup>13</sup></i>                                                                |                                                                  |       |            |                                                        |                            |            |                                                                                             |                            |            |
| Upper (lower)<br>bound for IG<br>(NG)                                                                                                                                                                             | 589                                                              | 512   | 77         | 7,529,994                                              | 7,445,448                  | 84,546     | 2,921,092                                                                                   | 2,903,209                  | 17,883     |
| <i>Mandatory EMS call-out, varying probability of release on scene after successful caregiver/acquaintance treatment (release on scene following failed caregiver/acquaintance treatment at 43%)<sup>24</sup></i> |                                                                  |       |            |                                                        |                            |            |                                                                                             |                            |            |
| 50% released                                                                                                                                                                                                      | 1,384                                                            | 1,275 | 110        | 11,014,107                                             | 10,894,077                 | 120,030    | 3,660,257                                                                                   | 3,634,868                  | 25,388     |
| All released                                                                                                                                                                                                      | 1,269                                                            | 348   | 921        | 10,508,513                                             | 9,500,686                  | 1,007,827  | 3,552,993                                                                                   | 3,339,821                  | 213,172    |
| <i>Acquisition costs of glucagon (low cost: USD 224, high cost: USD 336 per glucagon)</i>                                                                                                                         |                                                                  |       |            |                                                        |                            |            |                                                                                             |                            |            |
| Low IG/high<br>NG cost                                                                                                                                                                                            | 1,289                                                            | 410   | 880        | 10,262,703                                             | 9,433,837 <sup>b</sup>     | 828,866    | 3,236,127                                                                                   | 3,166,781 <sup>b</sup>     | 69,347     |
| Low NG/high<br>IG cost                                                                                                                                                                                            | 1,401                                                            | 298   | 1,104      | 11,425,315                                             | 10,082,408                 | 1,342,907  | 4,012,212                                                                                   | 3,622,192                  | 390,020    |

<sup>a</sup>EMS, Emergency Medical Services; IG, Injectable Glucagon; NG, Nasal Glucagon

<sup>b</sup>The new intervention mix increased glucagon costs but still reduced professional medical treatment costs.
